# Supplementary material for: Arthroplasty care redesign related to the Comprehensive Care for Joint Replacement model: results at a tertiary academic medical center
Source: PubMed Central journal article supplement — Arthroplast Today. 2018 Mar 21;4(2):221–6. doi: 10.1016/j.artd.2018.02.002 (PMC5994641; doi:10.1016/j.artd.2018.02.002), 2018-03-21
Supplement: mmc3.pdf [file mmc3.pdf]

# CONFLICT OF INTEREST STATEMENT

## *Arthroplasty Today*

(Adopted from the American Academy of Orthopaedic Surgeons disclosure statement)

The following form **must be filled out completely and submitted by each author (example, 6 authors, 6 forms). If no discloser is required, please write/type "none" at the end of each sentence.**

Manuscript Title **Arthroplasty Care Redesign Related to the Comprehensive Care for Joint Replacement Model: Results at a Tertiary Academic Medical Center**

1. Royalties from a company or supplier (The following conflicts were disclosed)

None

2. Speakers bureau/paid presentations for a company or supplier (The following conflicts were disclosed)

Paid speaker for webinar presentation for OrthoService Line April 20, 2017

3A. Paid employee for a company or supplier (The following conflicts were disclosed)

None

3B. Paid consultant for a company or supplier (The following conflicts were disclosed)

None

3C. Unpaid consultants for a company or supplier (The following conflicts were disclosed)

None

4. Stock or stock options in a company or supplier (The following conflicts were disclosed)

None

5. Research support from a company or supplier as a Principal Investigator (The following conflicts were disclosed)

None

6. Other financial or material support from a company or supplier (The following conflicts were disclosed)

None

7. Royalties, financial or material support from publishers (The following conflicts were disclosed)

None

8. Medical/Orthopaedic publications editorial/governing board (The following conflicts were disclosed)

None

9. Board member/committee appointments for a society (The following conflicts were disclosed)

None

**Each author must sign AND print or type his/her name, date and submit a separate form**

In addition, one BLINDED Conflict of Interest form (no author names used) should be submitted per manuscript with all author disclosures.

Andrew T. Duncan

Author Name (Print or Type)



Author Signature

11-27-2017

Date
